## 1 **Genetic control of cellular morphogenesis in Müller glia**

2 Mark Charlton-Perkins<sup>1</sup>, Alexandra D. Almeida<sup>1</sup>, Ryan B. MacDonald<sup>2,3</sup>, William A.  
3 Harris<sup>1,3</sup>

4 1. Department of Physiology, Development and Neuroscience, University of  
5 Cambridge, Cambridge, CB2 3DY, UK.

6 2. Department of Infection, Immunity and Cardiovascular Disease, Medical School  
7 and the Bateson Centre, University of Sheffield, Sheffield, S10 2TN, UK.

8 3. These authors jointly directed this work.

9 Correspondence should be addressed to R.B.M ([r.macdonald@sheffield.ac.uk](mailto:r.macdonald@sheffield.ac.uk)) or  
10 W.A.H ([wah20@cam.ac.uk](mailto:wah20@cam.ac.uk)).

11 **Of all the cells in the body, those with the greatest variety of shapes reside in**  
12 **the central nervous system yet they all start their postmitotic lives as simple**  
13 **elongated cells of the neuroepithelium<sup>1</sup>. The molecular processes by which**  
14 **these, or indeed any, cells gain their particular cell-specific anatomies remain**  
15 **largely unexplored. We, therefore, developed a strategy to identify the genes**  
16 **involved in cellular morphogenesis using Müller glial (MG) cells in the**  
17 **vertebrate retina as a model system. These radially oriented cells, discovered**  
18 **by Heinrich Müller in 1851 and named in his honour<sup>2</sup>, are astonishingly**  
19 **complex yet, as the great neurohistologist Ramon y Cajal first noted, they**  
20 **share a conserved set of key anatomical features<sup>3</sup>. Using genomic and**  
21 **CRISPR based strategies in zebrafish, combined with a temporal dissection of**  
22 **the process, we found more than 40 genes involved in MG cell morphogenesis.**  
23 **Strikingly, the sequential steps of anatomical feature addition are regulated by**  
24 **successive expression of cohorts of interrelated genes, revealing**  
25 **unprecedented insights into the developmental genetics of cellular**  
26 **morphogenesis.**

27 Despite their species-specific variability, mature MG cells in all vertebrate retinas  
28 share the following key features (Figure 1A): 1) their cell bodies sit in the middle  
29 cellular layer of the retina - the inner nuclear layer (INL); 2) their central radial stalks  
30 span the apicobasal extent of the retina, with endfeet upon both the outer and the  
31 inner limiting membranes (OLM and ILM); 3) fine branches emerge laterally from  
32 these central stalks extending differentially into the two synaptic layers, known as the  
33 outer and inner plexiform layers (OPL and IPL). Thus, the mature MG cell  
34 morphology facilitates their contact with every cell, and possibly every synapse, in  
35 the retina and enables them to carry out their many homeostatic physiological  
36 functions<sup>4,5</sup>.

37 The conserved, yet complex cellular anatomy of MG cells makes them an excellent  
38 cell type to investigate the genes involved in cellular morphogenesis. Previous  
39 studies have shown that MG exhibit several discrete steps of anatomical  
40 specialization<sup>3,6-11</sup>. Notch signalling is essential for MG cell specification and in the  
41 Tg(*TP1:Venus*) transgenic line<sup>12</sup>, the Notch-responsive element TP1 drives  
42 expression of the fluorescent protein Venus, allowing MG cells to be followed from  
43 the time of their initial specification in zebrafish at ~60 hours post-fertilisation (hpf)<sup>7</sup>.  
44 We visualised MG morphogenesis in zebrafish *in vivo*, by transplanting blastomeres  
45 from the transgenic zebrafish line, into wild-type hosts (Figure 1B). At 60hpf, the MG  
46 cell bodies begin to migrate basally to their stereotypic position in the middle of the  
47 INL of the retina<sup>7</sup>. By 72hpf, they begin to expand their apical and basal endfeet  
48 along the OLM and ILM respectively and they extend dynamic filopodia from their  
49 central stalks, which identify the OLP and the apical and basal limits of the IPL. By  
50 96hpf they elaborate fine processes with the plexiform layers<sup>8</sup>. One of the last steps  
51 in this process is that MG cells space themselves out across the retina. When first  
52 specified, MG cells are positioned much more randomly but, like many types of  
53 retinal neurons, their processes are arranged in tiled mosaic with little overlap  
54 between the domains of neighbouring MG cells<sup>8,9</sup>. Homotypic repulsive cell  
55 interactions are thought to account for this<sup>8,13</sup>, as focal ablation of MG cells results in  
56 nearby MG cells extending processes to fill in the spaces previously occupied by the  
57 ablated MG cell<sup>8</sup>. Thus, by the time robust vision commences in zebrafish at about  
58 120hpf<sup>14</sup>, MG cells have gained a full set of cell-specific anatomical characteristics  
59 (Figure 1A, B)<sup>7,8</sup>.

60 Cellular morphogenesis has been studied mostly at the cellular level, and in spite of  
61 the obvious coupling with development stages, the genetic control of cell shape in  
62 development is very poorly understood. To search for the genes involved in MG cell  
63 morphogenesis, we first identified genes expressed preferentially in FACS-sorted  
64 MG at specific times that span this morphogenetic process (48hpf, 60hpf, 72hpf,  
65 96hpf, 120hpf and 192hpf) (Figure 1C). Hierarchical clustering and principal  
66 component analysis of these data reveal that replicates of individual time-points have  
67 no apparent differences (Extended data fig 1A). However, significant differential  
68 gene expression is notable over the course of MG cell differentiation (Extended data  
69 fig 1A; Supp table 1). Importantly, clustering all time-points by differential gene  
70 enrichment (FDR), shows that several of the top 100 genes (e.g. *gfap*, *slc1a2b*,  
71 *rlbp1a*, *apq4*, *slc25a3a*, *slc2a1a*, *ncaldb*, *glula* and *slc1a2a*) have previously been  
72 associated directly with MG cells or other glia (Figure 2C, Supp table 2)<sup>15-23</sup>.  
73 Furthermore, our data has greater than 80% overlap with a previous zebrafish MG  
74 cell transcriptome dataset (Figure 1D)<sup>24</sup>. The conservation of MG cell biology is  
75 highlighted by the significant genetic overlaps with three studies of mouse MGs (Fig  
76 1D; Extended data fig 1B)<sup>25-27</sup>. Finally, invertebrate retinal glia also shares a  
77 significant proportion of gene orthologs with mouse MG cells (Figure 1D)<sup>28</sup>.

78 Overrepresentation analysis of the gene ontology GO terms identified for each  
79 developmental stage revealed dynamic changes in the biological and molecular

80 functions of differentially expressed genes over the course of MG cell development  
81 (Extended data table 1). For example, the earliest stages (48-60hpf) of development  
82 include processes associated with cell specification, cell cycle exit, transport, growth  
83 and anatomical structure (Figure 1E). As differentiation progresses (96-192hpf), GOs  
84 of adhesion, carbohydrates and lipid metabolism, membrane transporters, and cation  
85 activity are over-represented suggesting that this is when the cells begin acquire  
86 their cell-type specific physiology (Figure 1E).

87 We first wanted to test whether any of the most highly conserved genes (i.e. those  
88 expressed in flies, fish and mammals) were essential for MG cell morphogenesis.  
89 Therefore, we limited our attention to those genes that code for proteins that likely  
90 impact cell morphology (e.g. cell adhesion, junction formation, cell structure or cell  
91 patterning) (Extended data table 2). We then used a CRISPR based reverse genetic  
92 screen to knock out these genes<sup>29</sup> in the Tg(*GFAP:GFP*) transgenic background<sup>30</sup>  
93 and looked for morphological defects in the MG cells of injected embryos at 120hpf  
94 (Extended data table 2). Control embryos injected with a guide RNA targeting the  
95 pigment gene, *slc24a5*, were devoid of much of their pigmentation while keeping MG  
96 cell shape and position unchanged (Figure 2A, Extended data fig 1C)<sup>29</sup>. The  
97 CRISPRed fish all continued to express the *GFAP:GFP* transgene in MG cells,  
98 suggesting initial glial specification is unaffected in any of the CRISPR mutants.  
99 However, we found an array of morphological defects in the MG population in many  
100 of the injected embryos. Indeed, CRISPR mutants for 11 of the 19 of these  
101 conserved genes showed defects in many of the conserved anatomical features of  
102 MG morphology (summarised in extended data table 2). Importantly, we generated  
103 F1 lines for several of these (*pax2a*, *nphs1*, *kirrela*, *ltga5*, *ltga6*, *wt1b*, *cadm1b* and  
104 *cadm4*) and confirmed that CRISPR mutation was highly specific (by DNA  
105 sequencing) and penetrant (by phenotype similarity), in agreement with previous  
106 reports (Extended data fig 2H)<sup>29</sup>.

107 One of the mutants that is particularly disruptive to MG cell morphology is in the  
108 *pax2a* gene. Pax2 is a paired domain transcription factor that has essential roles in  
109 the cellular patterning of the brain and kidney<sup>31</sup>. The *pax2a* CRISPR mutation was  
110 verified by the fact that Pax2 immunostaining at 72hpf shows positive nuclei in  
111 control animals but mostly absent in F0 CRISPR injected fish and completely absent  
112 in F1 *pax2a* mutants (Figure 3D-F). CRISPR knock-outs of two nephrins (*nphs1* and  
113 *kirrela*) and the transcription factor *Wt1b*, all of which are known to work with Pax2  
114 during kidney and CNS differentiation<sup>31-33</sup> also resulted in defects in many MG cell  
115 morphological features (Extended data fig 2A-C). In the kidney podocytes, the  
116 expression of membrane spanning Nephrens are linked to the expression of Pax2  
117 and *Wt1*<sup>31</sup>, and it is interesting to note that the two *nephrin* mutants have more  
118 limited defects and than either *pax2a* or *wt1b* mutants. Remarkably, analysis of the  
119 transcriptome of MG cells in *pax2a* mutants shows that 60% of the genes we that we  
120 tested that affect MG cell morphogenesis have significant changes of expression,  
121 whereas only about 30% of those that did not affect MG cell morphogenesis were  
122 misregulated in *pax2a* mutants (Figure 2J). Furthermore, GO analysis on the

123 differentially expressed genes in Pax2a mutant MG cells shows a significant  
124 enrichment of GO terms related to cell morphology, adhesion and differentiation  
125 (Figure 1K). These results suggest that Pax2a may be a “master regulator” of MG  
126 cell morphology (Supp table 3).

127 The rapid co-ordinated expansion of MG cell morphological domains along the apical  
128 and basal limiting membranes and within the cellular layers of the retina suggests  
129 differential interactions with the extracellular matrix (ECM) and neurons are likely to  
130 be involved in MG cell morphogenesis. Indeed, the ECM receptor, integrin has  
131 previously been associated with glial radial glial defects<sup>34</sup>, and we found that several  
132 of these *integrin* genes when mutated give rise to morphological phenotypes in MG  
133 cells (Figure 2G-I). It is particularly interesting that different members of the integrin  
134 family affect different morphological features of MG cells. Mutants for *itga5* have  
135 defects in the ILM and IPL (Figure 2G), *itga6* mutants have defects in the OLM, OPL  
136 (Figure 2H), and *itgB1a* mutants have defects in apical-basal positioning as well as  
137 in the OLM and ILM (Figure 2I). Mmp2 is a critical modulator of the ECM<sup>35–38</sup>, and  
138 we found that *mmp2* mutants share defects with these integrin mutants ( Extended  
139 data figure 2D). Mutants of the cell adhesion molecules Cadm4, Cadm1a and  
140 Cadm2b, in addition to unshared specific defects the plexiform layers, all show  
141 irregular MG cell tiling (Extended data figure 2E - G). Although the focus here is on  
142 those genes that are expressed in MG cells themselves, the involvement of such  
143 adhesion molecules, also fuels the understanding that MG cell morphogenesis  
144 cannot be an entirely autonomous process. MG cells must shape themselves  
145 appropriately with respect to their neighbours within the tissue of the retina. It would  
146 this be interesting to look for non-autonomous factors such as the ligands for these  
147 adhesion molecules.

148 The fact that such a large fraction of the conserved genes we tested affected MG cell  
149 morphogenesis, allowed us to ask whether there is any functional correlation  
150 between the temporal expression of morphogenetic genes and the sequentially  
151 arising features of these cells. We first used hierarchical clustering and Trimmed  
152 Means of M (TMM) differential expression analysis, to identify lists of genes that first  
153 became enriched at specific time points and remained enriched until 192hpf (i.e. 48-  
154 192hpf, 60-192hpf, 72-192hpf and 96-192hpf) (supplemental table 3). Then, we  
155 again used CRISPR/Cas9 to knock down candidates associated with cellular  
156 differentiation, cell adhesion, cell morphology and cell dynamics (Extended data  
157 table 2). Genes that were enriched from 48-192hpf included *nav1b* (part of the  
158 neuron navigator family of genes with limited recognised functions), *f8* (a coagulation  
159 factor exclusively known for its involvement for blood clotting), and *cdhr1* (a  
160 protocadherin which is highly expressed in the mature retina and link to human  
161 retinitis pigmentosa and cone-rod dystrophy)<sup>39</sup> (Figure 3A). All of these, when  
162 mutated, produced highly irregularly shaped MG cells with defects in many of the  
163 cells conserved morphological features (Figure 3B, C; Extended data figure 3B, C).  
164 Genes enriched from 60-192 hpf with mutant phenotypes include: *sptbn5* (a beta-  
165 spectrin that forms part of the cytoskeleton), *myo6b* (a myosin motor protein), *xirp1*

166 (an actin-binding protein associated with adherens junctions), and *map1ap* (a  
167 microtubule-associated protein) (Figure 3A). Each of these has defects in multiple,  
168 yet specific, aspects of MG cell morphogenesis but none showed apico-basal  
169 positioning defects (Figure 3B, D; Extended data figure 3D-H). Genes enriched from  
170 72-192hpf with mutant phenotypes include: *lamb2* (laminin component of  
171 extracellular matrix), *fat1b* (an atypical cadherin involved in Hippo signalling,  
172 *cadm1b* (also part of the cell adhesion molecule family), and *sox10* (SOX family  
173 transcription factor associated with peripheral glial differentiation) (Figure 3A). These  
174 displayed defects in fewer aspects of MG cell morphogenesis without defects in  
175 apico-basal positioning or OLM formation (Figure 3B, E; Extended data figure 3G –  
176 I). Genes enriched from 96-192hpf with mutant phenotypes include: *nfat5c* (a  
177 transcription factor associated with osmotic stress), *snx19a* (sorting nexin associated  
178 with g-protein coupled signalling), *nphp1* (a nephrocystin thought to be associated  
179 cilia-mediated signalling) (Figure 1A). All of these only showed defects in MG cell  
180 tiling (Figure 3B, F; Extended data figure 4 J, K). This gradation of phenotypes with  
181 genes enriched at early stages causing multiple severe defects in MG cell  
182 morphogenesis and later enriched genes having milder and fewer phenotypes  
183 suggest the reasonable hypothesis that the basic that some genes are involved in  
184 many steps of cellular morphogenesis, while others, especially those expressed later  
185 are involved in fewer steps.

186 To explore the temporal correlation further, we tested candidate genes whose  
187 transcripts were enriched during specific time points of development (Figure 4A).  
188 When we target two ECM proteins enriched at 48hpf, Lamb4 (laminin) and Timp2b  
189 (an inhibitor of Mmps), we observed defects in apical-basal soma positions (Figure  
190 4B, C; Extended data figure 4B), consistent with the fact that soma positioning  
191 occurs first between 48hpf and 60hpf (Figure 1B). Apical-basal soma defects were  
192 also seen in mutants of two other genes that were transiently enriched at 48hpf:  
193 *prtm6a* (a nuclear methylase) and *vwde* (Von Willebrand blood coagulation factor)  
194 (Figure 4B; Extended data figure 4C, D). In addition, *prmt6* mutants show defects in  
195 ILM formation, and *vwde* mutants show defects in OPL formation (Figure 4B,  
196 Extended data figure 4C, D). When we targeted genes that were overrepresented at  
197 60hpf, we observed no defects in apical-basal somal positioning, yet we did find  
198 defects in later stages of morphogenesis (Figure 4B). For instance, *dcaf8* (unknown  
199 molecular function) mutants have OPL and OLM defects (Figure 4D), *apcdd11*  
200 (unknown molecular function) mutants have defects in OPL and ILM defects and MG  
201 tiling (Extended data figure 4E), and *sybp* (a synaptic vesicle-associated protein)  
202 have MG spacing, OPL, OLM defects (Extended data figure 4F). Genes enriched at  
203 72hpf include *mmp28* (a protease regulator of extracellular matrix) and *cux2b* (a Cut-  
204 like transcription factor) (Figure 4A). These mutants had a more limited set of effects  
205 only in the ILM of *mmp28* mutants (Figure 4E) and effects on ILM and IPL in *cux2b*  
206 mutants (Figure 4B; Extended data figure 4G). Genes enriched at 96hpf include  
207 *cx31.7* (a gap junction connexin), *egr1* (a zinc finger transcription factor), and *slitrk2*  
208 (an integral membrane protein) (Figure 4A). *egr1* mutants have subtle defects in the

209 IPL and OPL (Figure 4F), *slitrk2* mutants only have defects in the OPL (Figure 4G),  
210 and *cx31.7* only show tiling defects (Extended data figure 4H). At 120hpf *icn2* (a  
211 gene of unknown molecular function), *mpp6b* (a membrane-associated guanylate  
212 kinase) and *cacnb2a* (a subunit voltage-dependent calcium channels) are enriched  
213 (Figure 4A). These mutants produce nothing more than MG cell tiling defects,  
214 (Figure 4H; Extended data figure 4G). Together, these data show a correspondence  
215 between the temporal patterning of gene expression and the development of  
216 particular features of cellular anatomy, suggesting an approach to begin to dissect  
217 the developmental history of the cellular morphogenesis.

218 The high level of conserved gene expression in glial cells within the animal kingdom,  
219 especially of those genes involved in MG cell morphogenesis, suggests that cell-  
220 specific morphogenetic processes are likely to be broadly shared. Many of these  
221 genes (or their homologues) are known from previous work to be involved in various  
222 aspects of cellular morphogenesis. The clearest example of this is the relationship  
223 between the *Pax2* and *Wt1* genes that have been identified as crucial for cellular  
224 patterning through their regulation of the Nephrens in kidney development in  
225 vertebrates<sup>31–33</sup> and for cell shape and patterning of glia in the fly eye<sup>40,41 28,42–44</sup>.  
226 The fact that the expression 60% of our candidate genes with essential roles in MG  
227 morphogenesis are regulated by Pax2a suggests a hierarchy of genetic regulation  
228 leading to effector genes such as the nephrens and integrins that carry out specific  
229 morphogenetic roles. It is thus noteworthy that three integrins (*Itga1a*, *Itga1b* and  
230 *Itgb1a*), which have been shown to play a role in radial glial morphogenesis in the  
231 cortex<sup>45,46</sup>, are each required for distinct features of MG cell morphology (Figure 2).  
232 This idea is strengthened by our finding of the expression of two beta-laminins is  
233 enriched in MG cells. *lamb4* is enriched early on (48hpf) and effects apical-basal  
234 soma position while *lamb2* is enriched from 60hpf onwards and is required in the  
235 spacing of MG cells as well as IPL formation (Figure 4). We also found some  
236 unexpected genes with roles in MG cell morphogenesis. Two of these include *vwf*  
237 and *f8* which have been extensively studied in the context of blood coagulation, and  
238 both have known human mutants that lead to human bleeding diseases<sup>47</sup>. In MG  
239 cells, both factors are expressed early in differentiation and have a severe effect on  
240 MG shape and spacing.

241 Our results point to specific genetic repertoires working at particular periods of  
242 development to generate specific anatomical features of MG cell morphogenesis.  
243 The fact that many of the genes we identified are conserved during MG cell  
244 development across the animal kingdom indicates that temporally conserved genetic  
245 programmes of cell shape and patterning evolved early. We believe that many of the  
246 principles of developmental biology gathered from the study of multicellular organic  
247 morphogenesis may be relevant to in the further studies of cellular morphogenesis,  
248 and that this study may provide an entry point for the further dissection of the  
249 molecular mechanisms of cell morphogenesis.

250

## 251 **Methods**

### 252 **Animals**

253 Adult zebrafish were maintained and bred at 26.5°C. Embryos were raised at 25°C–  
254 32°C and staged based on hpf<sup>48</sup>. Embryos were treated with 0.003% phenylthiourea  
255 (Sigma) from 10 hpf to prevent pigmentation. All animal work was approved by Local  
256 Ethical Review Committee at the University of Cambridge and performed according  
257 to the protocols of project license PPL 80/2198.

### 258 **Transgenic Lines**

259 Transgenic lines *Tg(atoh7:gap43-mRFP1)cu2*<sup>49</sup>, *Tg(GFAP:GFP)*<sup>30</sup>, *Tg(TP1:Venus-*  
260 *Pest)*<sup>12</sup>.

### 261 **FACS, RNA-seq and Bioinformatics**

262 20–40 whole eyes of *Tg(GFAP:GFP)* fish were dissected from each developmental  
263 time point (48, 60, 72, 96, 120 and 192 hpf) in and washed several times to remove  
264 debris in L-15 (Leibovitz's L-15 Medium). Eyes were then incubated in Trypsin-  
265 EDTA 0.25% (Sigma) at 37°C for 15min, washed several times and dissociated  
266 using FBS coated pipette tips in Calcium-free medium (116.6 mM NaCl, 0.67 mM  
267 KCl, 4.62 mM Tris, 0.4 mM EDTA). Single cell suspensions were sorted on a  
268 Beckman Coulter MoFlo to capture Muller glia (GFP) and control retinal tissue (non-  
269 GFP). Cells were sorted into lysis buffer, and RNA was immediately extracted using  
270 the RNeasy mini kit (Qiagen). RNA concentration and qualities were assessed on an  
271 Agilent Bioanalyzer and RNA amplification and cDNA synthesis was performed with  
272 the Ovation RNA Amplification System V2 (NuGEN) using manufacturer's protocol.  
273 Nextera library preparations were performed using the Nextera DNA library kit  
274 according to the manufacturer's directions and sent to the Sanger Center for  
275 sequencing.

276 Sequence files were paired, trimmed and aligned using Hisat2 to the zebrafish  
277 genome (version: Zv9) and RNA-seq bioinformatic and statistical analysis was  
278 performed in R using the Bioconductor, Featurecounts, Rsubread, limma, DESeq2,  
279 DEFormats, pheatmap, ggplots, org.Dr.er.db, and EdgeR packages. Cross-species  
280 gene conversions were performed using Ensembl (Biomart) and statistical  
281 significance of gene overlaps was done using a Fisher's exact test with Bonferroni  
282 correction. Gene Ontology analysis and statistics were performed using Gene  
283 Ontology Consortium<sup>50,51</sup>.

### 284 **Embryo Manipulations**

285 For blastomere transplantations, high- to oblong-stage embryos were dechorionated  
286 by pronase digestion (Sigma), placed in agarose moulds, and between 5 and 30  
287 blastomeres were transferred between *Tg(TP1:Venus)* embryos to wildtype embryos  
288 using a glass capillary connected to a 2 ml syringe. Embryos were grown on dishes

289 coated with 1% agarose in 0.04% PTU overnight until imaged by confocal  
290 microscopy.

### 291 **sgRNA design and Reverse Genetic Screen**

292 The sgRNA design and strategy are largely based on the methods from Shah and  
293 colleagues<sup>29</sup>. Briefly, each guide RNA was designed using the ChopChop design  
294 tool<sup>52</sup> at [chopchop.cbu.uib.no/index.php](http://chopchop.cbu.uib.no/index.php). For each gene, the two gRNAs with  
295 minimal predicted off-target sites were selected. In the first screen these we picked  
296 the targets with overall ranking while in the second screen we used the highest  
297 ranking targets for the first and last exons of each gene. Template DNA was  
298 synthesised by *in vitro* transcription of a two oligo PCR method. For this, an oligo  
299 scaffold containing the RNA loop structure  
300 5'[gatccgcaccgactcgggtgccacttttcaagttgataacggactagccttattttaacttgctatttctagctctaaaac  
301 ]3' required for Cas9 was synthesised and used for the syntheses of all gRNAs  
302 (Extended data table 2). Next, a unique oligo containing the T7 promoter, the 20  
303 nucleotides gRNA, and 20 bases of homology to the scaffold oligo was synthesised.  
304 PCR amplification of these annealed oligos sequence was created using Phusion  
305 master mix (England BioLabs, M0531L) with 10uM scaffold and gRNA for 40 cycles  
306 in a thermal cycler. This PCR product was purified (PCR purification kit - Qiagen)  
307 and used as a template for the *in vitro* transcription reaction (T7 megascript –  
308 Ambion). RNA was purified on columns (Zymo Research, D4014) and injected using  
309 100pg of each gRNA (200ng total) with 1200pg of Cas9 encoding mRNA.

### 310 **Immunostaining, Microscopy and data analysis**

311 For immunostaining samples were fixed in 4% paraformaldehyde overnight at 4°C,  
312 washed in PBS and then stored in MeOH at -20°C until used. Samples were re-  
313 hydrated in a MeOH:PBS series (3:1, 1:1, 1:3) followed by three PBST (PBS +  
314 0.05% Triton-X100) washes. Primary and secondary antibodies were diluted in PBS  
315 using the following concentrations: Rabbit anti-Pax2 1:200 (Sigma), goat anti-rabbit  
316 conjugated Alexa Fluor 555 1:500 (Invitrogen) and GFP-Booster Atto488 1:500  
317 (Chormotek). Samples were mounted on slides with a coverslip bridge (to prevent  
318 crushing the tissue) in Prolong Diamond (Invitrogen) and allowed to cure at room  
319 temperature overnight before imaging.

320 Laser scanning confocal imaging was performed using an Olympus FV1000  
321 microscope with a 60 X oil objective (1.35 NA). For live imaging, optical sections at  
322 0.5–1 µm separation were taken to cover the region of the retina containing the cells  
323 of interest (between 40 and 100µm) every 15 minutes over a 12 hour period.  
324 Confocal imaging of live and fixed embryos was performed as described previously  
325<sup>53</sup>. Confocal data was analysed and processed using Volocity (Improvision) and  
326 ImageJ/FIJI (NIH).

327

328



329 **Tables**

330

331

332 **Extended Data table 1: Gene ontologies of each stage of MG cell**  
333 **differentiation.**

334 **Extended Data table 2: Summary of all genes used with gRNAs and**  
335 **phenotypes.**

336 **Supplemental table 1: TMM fold change analysis of each MG cell**  
337 **developmental stage.**

338 **Supplemental table 2: Log counts per million for all samples**

339 **Supplemental table 3: TMM gene enrichments of Pax2a mutant MG cells**

340

341

342

343

344

345

346

347

348 **References**

349 1. Kandel, E. *Principles of Neural Science, Fifth Edition*. (McGraw Hill Professional,  
350 2013).

351 2. MULLER & H. Zur Histologie der Netzhaut. *Zeitschrift fur Wissenschaft und*  
352 *Zoologie* **3**, 234–237 (1851).

353 3. Cajal, S. R. y. *La rétine des vertébrés*. (1892).

354 4. Jadhav, A. P., Roesch, K. & Cepko, C. L. Development and neurogenic potential  
355 of Müller glial cells in the vertebrate retina. *Prog. Retin. Eye Res.* **28**, 249–262  
356 (2009).

357 5. Reichenbach, A. & Bringmann, A. New functions of Müller cells. *Glia* **61**, 651–  
358 678 (2013).

359 6. MacDonald, R. B., Charlton-Perkins, M. & Harris, W. A. Mechanisms of Müller  
360 glial cell morphogenesis. *Curr. Opin. Neurobiol.* **47**, 31–37 (2017).

361 7. MacDonald, R. B. *et al.* Müller glia provide essential tensile strength to the

- 362        developing retina. *J. Cell Biol.* **210**, 1075–1083 (2015).
- 363    8. Williams, P. R. *et al.* In vivo development of outer retinal synapses in the  
364        absence of glial contact. *J. Neurosci.* **30**, 11951–11961 (2010).
- 365    9. Wang, J. *et al.* Anatomy and spatial organization of Müller glia in mouse retina.  
366        *J. Comp. Neurol.* **525**, 1759–1777 (2017).
- 367    10. Kolb, H., Nelson, R., Ahnelt, P. & Cuenca, N. Cellular organization of the  
368        vertebrate retina. *Prog. Brain Res.* **131**, 3–26 (2001).
- 369    11. Reichenbach, A. & Reichelt, W. Postnatal development of radial glial (Müller)  
370        cells of the rabbit retina. *Neurosci. Lett.* **71**, 125–130 (1986).
- 371    12. Ninov, N., Borius, M. & Stainier, D. Y. R. Different levels of Notch signaling  
372        regulate quiescence, renewal and differentiation in pancreatic endocrine  
373        progenitors. *Development* **139**, 1557–1567 (2012).
- 374    13. Bushong, E. A., Martone, M. E., Jones, Y. Z. & Ellisman, M. H. Protoplasmic  
375        astrocytes in CA1 stratum radiatum occupy separate anatomical domains. *J.*  
376        *Neurosci.* **22**, 183–192 (2002).
- 377    14. Biehlmaier, O., Neuhauss, S. C. F. & Kohler, K. Synaptic plasticity and  
378        functionality at the cone terminal of the developing zebrafish retina. *J. Neurobiol.*  
379        **56**, 222–236 (2003).
- 380    15. Eisenfeld, A. J., Bunt-Milam, A. H. & Sarthy, P. V. Müller cell expression of glial  
381        fibrillary acidic protein after genetic and experimental photoreceptor  
382        degeneration in the rat retina. *Invest. Ophthalmol. Vis. Sci.* **25**, 1321–1328  
383        (1984).
- 384    16. Lehre, K. P., Davanger, S. & Danbolt, N. C. Localization of the glutamate  
385        transporter protein GLAST in rat retina. *Brain Res.* **744**, 129–137 (1997).
- 386    17. White, R. D. & Neal, M. J. The uptake of L-glutamate by the retina. *Brain Res.*

- 387           **111**, 79–93 (1976).
- 388    18. Saari, J. C. *et al.* Visual cycle impairment in cellular retinaldehyde binding  
389           protein (CRALBP) knockout mice results in delayed dark adaptation. *Neuron* **29**,  
390           739–748 (2001).
- 391    19. Jo, A. O. *et al.* TRPV4 and AQP4 Channels Synergistically Regulate Cell  
392           Volume and Calcium Homeostasis in Retinal Müller Glia. *J. Neurosci.* **35**,  
393           13525–13537 (2015).
- 394    20. Dahlin, A., Royall, J., Hohmann, J. G. & Wang, J. Expression profiling of the  
395           solute carrier gene family in the mouse brain. *J. Pharmacol. Exp. Ther.* **329**,  
396           558–570 (2009).
- 397    21. Zong, H. *et al.* Hyperglycaemia-induced pro-inflammatory responses by retinal  
398           Müller glia are regulated by the receptor for advanced glycation end-products  
399           (RAGE). *Diabetologia* **53**, 2656–2666 (2010).
- 400    22. Riepe, R. E. & Norenburg, M. D. Müller cell localisation of glutamine synthetase  
401           in rat retina. *Nature* **268**, 654–655 (1977).
- 402    23. Lehre, K. P. & Danbolt, N. C. The number of glutamate transporter subtype  
403           molecules at glutamatergic synapses: chemical and stereological quantification  
404           in young adult rat brain. *J. Neurosci.* **18**, 8751–8757 (1998).
- 405    24. Qin, Z., Barthel, L. K. & Raymond, P. A. Genetic evidence for shared  
406           mechanisms of epimorphic regeneration in zebrafish. *Proc. Natl. Acad. Sci. U.*  
407           *S. A.* **106**, 9310–9315 (2009).
- 408    25. Roesch, K. *et al.* The transcriptome of retinal Müller glial cells. *J. Comp. Neurol.*  
409           **509**, 225–238 (2008).
- 410    26. Nelson, B. R. *et al.* Genome-wide analysis of Müller glial differentiation reveals a  
411           requirement for Notch signaling in postmitotic cells to maintain the glial fate.

- 412 *PLoS One* **6**, e22817 (2011).
- 413 27. Macosko, E. Z. *et al.* Highly Parallel Genome-wide Expression Profiling of  
414 Individual Cells Using Nanoliter Droplets. *Cell* **161**, 1202–1214 (2015).
- 415 28. Charlton-Perkins, M. A., Sandler, E. D., Buschbeck, E. K. & Cook, T. A.  
416 Multifunctional glial support by Semper cells in the Drosophila retina. *PLoS*  
417 *Genet.* **13**, e1006782 (2017).
- 418 29. Shah, A. N., Davey, C. F., Whitebirch, A. C., Miller, A. C. & Moens, C. B. Rapid  
419 Reverse Genetic Screening Using CRISPR in Zebrafish. *Zebrafish* **13**, 152–153  
420 (2016).
- 421 30. Bernardos, R. L. & Raymond, P. A. GFAP transgenic zebrafish. *Gene Expr.*  
422 *Patterns* **6**, 1007–1013 (2006).
- 423 31. Quaggin, S. E. Transcriptional regulation of podocyte specification and  
424 differentiation. *Microsc. Res. Tech.* **57**, 208–211 (2002).
- 425 32. Ambu, R. *et al.* WT1 expression in the human fetus during development. *Eur. J.*  
426 *Histochem.* **59**, 2499 (2015).
- 427 33. Putaala, H., Soininen, R., Kilpeläinen, P., Wartiovaara, J. & Tryggvason, K. The  
428 murine nephrin gene is specifically expressed in kidney, brain and pancreas:  
429 inactivation of the gene leads to massive proteinuria and neonatal death. *Hum.*  
430 *Mol. Genet.* **10**, 1–8 (2001).
- 431 34. Georges-Labouesse, E., Mark, M., Messaddeq, N. & Gansmüller, A. Essential  
432 role of alpha 6 integrins in cortical and retinal lamination. *Curr. Biol.* **8**, 983–986  
433 (1998).
- 434 35. Yamana, S. *et al.* The Cell Adhesion Molecule Necl-4/CADM4 Serves as a  
435 Novel Regulator for Contact Inhibition of Cell Movement and Proliferation. *PLoS*  
436 *One* **10**, e0124259 (2015).

- 437 36. Moiseeva, E. P., Straatman, K. R., Leyland, M. L. & Bradding, P. CADM1  
438 controls actin cytoskeleton assembly and regulates extracellular matrix adhesion  
439 in human mast cells. *PLoS One* **9**, e85980 (2014).
- 440 37. Turksen, K., Opas, M. & Kalnins, V. I. Cytoskeleton, Adhesion, and Extracellular  
441 Matrix of Fetal Human Retinal Pigmented Epithelial Cells in Culture. *Ophthalmic*  
442 *Res.* **21**, 56–66 (1989).
- 443 38. Li, D. *et al.* CADM2, as a new target of miR-10b, promotes tumor metastasis  
444 through FAK/AKT pathway in hepatocellular carcinoma. *J. Exp. Clin. Cancer*  
445 *Res.* **37**, 46 (2018).
- 446 39. Stingl, K. *et al.* CDHR1 mutations in retinal dystrophies. *Sci. Rep.* **7**, 6992  
447 (2017).
- 448 40. Cagan, R. The signals that drive kidney development: a view from the fly eye.  
449 *Curr. Opin. Nephrol. Hypertens.* **12**, 11–17 (2003).
- 450 41. Bao, S. & Cagan, R. Preferential Adhesion Mediated by Hibris and Roughest  
451 Regulates Morphogenesis and Patterning in the Drosophila Eye. *Dev. Cell* **8**,  
452 925–935 (2005).
- 453 42. Flores, G. V., Daga, A., Kalhor, H. R. & Banerjee, U. Lozenge is expressed in  
454 pluripotent precursor cells and patterns multiple cell types in the Drosophila eye  
455 through the control of cell-specific transcription factors. *Development* **125**,  
456 3681–3687 (1998).
- 457 43. Fu, W. & Noll, M. The Pax2 homolog sparkling is required for development of  
458 cone and pigment cells in the Drosophila eye. *Genes Dev.* **11**, 2066–2078  
459 (1997).
- 460 44. Charlton-Perkins, M. *et al.* Prospero and Pax2 combinatorially control neural cell  
461 fate decisions by modulating Ras- and Notch-dependent signaling. *Neural Dev.*

- 462           **6**, 20 (2011).
- 463   45. Belvindrah, R., Graus-Porta, D. & Goebbels, S.  $\beta$ 1 integrins in radial glia but not  
464           in migrating neurons are essential for the formation of cell layers in the cerebral  
465           cortex. *Journal of* (2007).
- 466   46. Förster, E. *et al.* Reelin, Disabled 1, and beta 1 integrins are required for the  
467           formation of the radial glial scaffold in the hippocampus. *Proc. Natl. Acad. Sci.*  
468           *U. S. A.* **99**, 13178–13183 (2002).
- 469   47. Desch, K. C. Regulation of plasma von Willebrand factor. *F1000Res.* **7**, 96  
470           (2018).
- 471   48. Kimmel, C. B., Ballard, W. W., Kimmel, S. R., Ullmann, B. & Schilling, T. F.  
472           Stages of embryonic development of the zebrafish. *Dev. Dyn.* **203**, 253–310  
473           (1995).
- 474   49. Zolessi, F. R., Poggi, L., Wilkinson, C. J., Chien, C.-B. & Harris, W. A.  
475           Polarization and orientation of retinal ganglion cells in vivo. *Neural Dev.* **1**, 2  
476           (2006).
- 477   50. Ashburner, M. *et al.* Gene ontology: tool for the unification of biology. The Gene  
478           Ontology Consortium. *Nat. Genet.* **25**, 25–29 (2000).
- 479   51. The Gene Ontology Consortium. Expansion of the Gene Ontology  
480           knowledgebase and resources. *Nucleic Acids Res.* **45**, D331–D338 (2017).
- 481   52. Labun, K., Montague, T. G., Gagnon, J. A., Thyme, S. B. & Valen, E.  
482           CHOPCHOP v2: a web tool for the next generation of CRISPR genome  
483           engineering. *Nucleic Acids Res.* **44**, W272–6 (2016).
- 484   53. Das, T., Payer, B., Cayouette, M. & Harris, W. A. In vivo time-lapse imaging of  
485           cell divisions during neurogenesis in the developing zebrafish retina. *Neuron* **37**,  
486           597–609 (2003).

487 54. Nelson, B. R. *et al.* Genome-wide analysis of Müller glial differentiation reveals a  
488 requirement for Notch signaling in postmitotic cells to maintain the glial fate.

489 *PLoS One* **6**, e22817 (2011).

490 55. Sifuentes, C. J., Kim, J.-W., Swaroop, A. & Raymond, P. A. Rapid, Dynamic

491 Activation of Müller Glial Stem Cell Responses in Zebrafish. *Invest. Ophthalmol.*

492 *Vis. Sci.* **57**, 5148–5160 (2016).

493

494

A

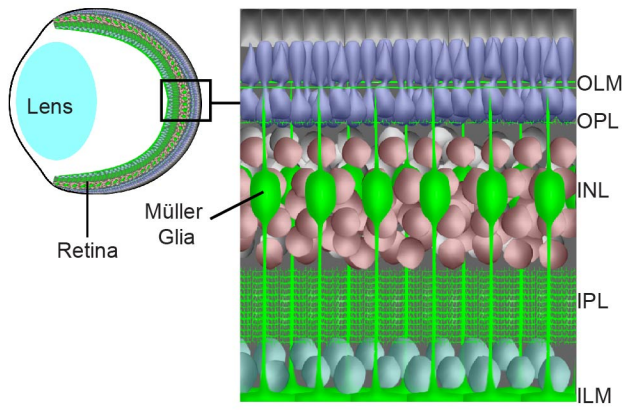

B

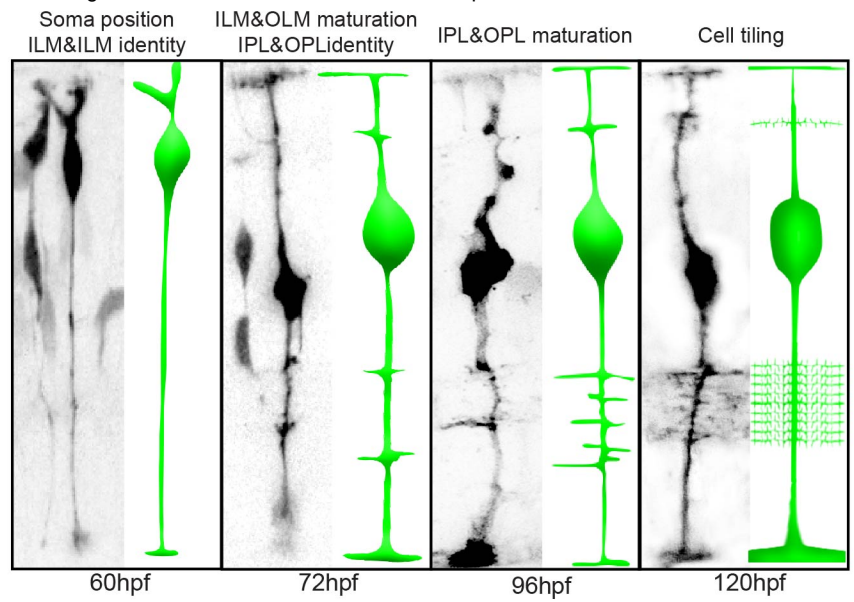

C

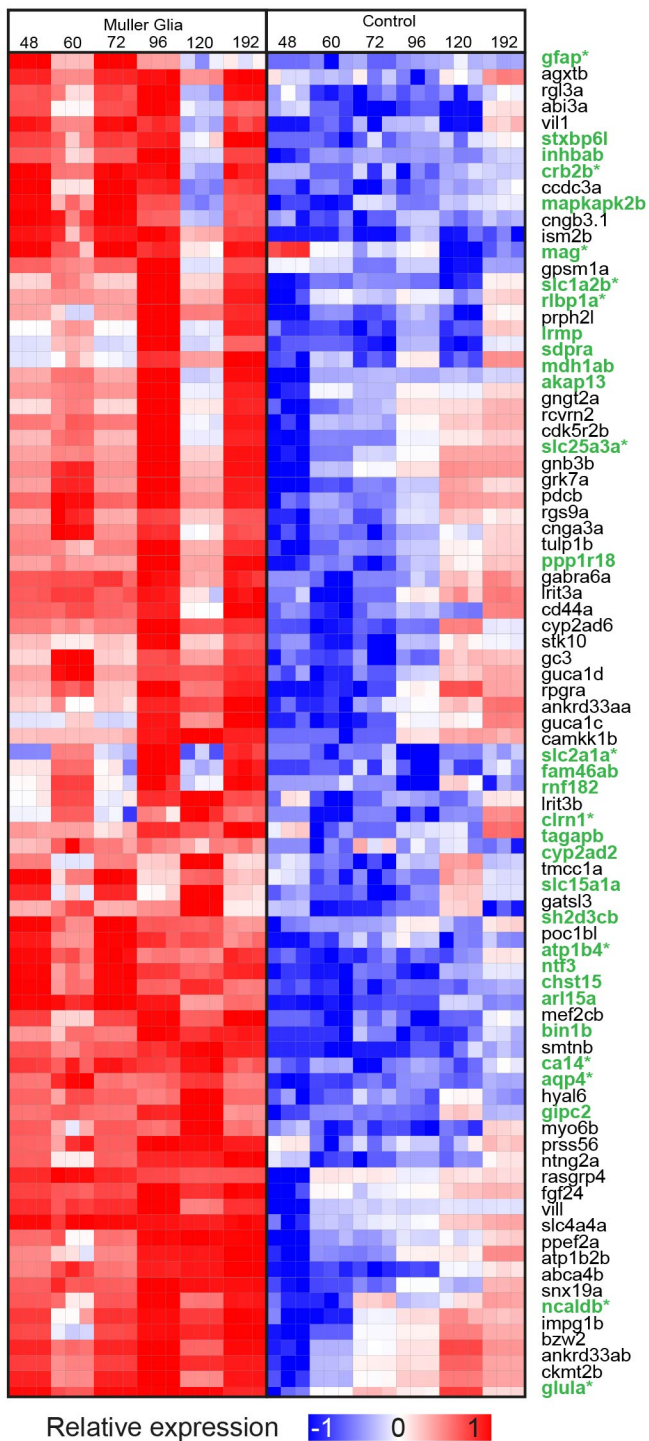

D

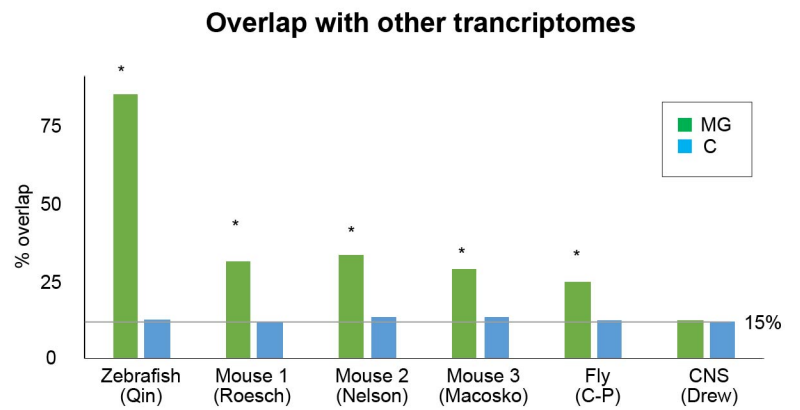

E

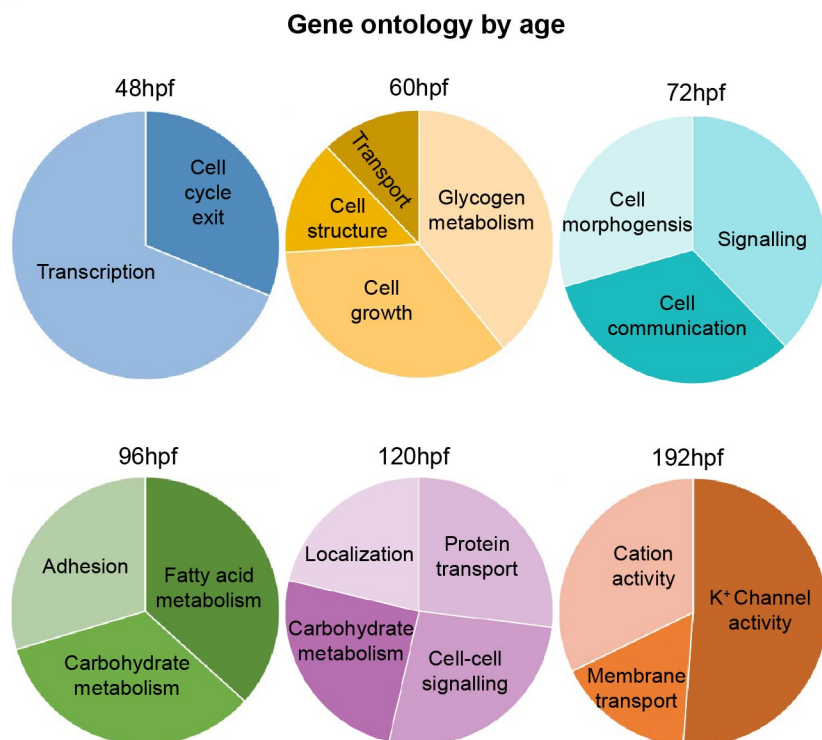

Figure 1



**Figure 1: Temporal MG cell morphology and gene expression.** A) Diagrammatic representation of the retina within the eye showing positioning of MG cells. B) *Tg*(TP1:Venus) transplanted MG cells showing the time course of MG cell differentiation that gives rise to the distinct MG compartments (OLM – outer limiting membrane, OPL – outer plexiform layer, INL – inner nuclear layer, IPL – inner plexiform layer, ILM – inner limiting membrane). C) Heatmap of top 100 significantly expressed genes with glial genes in green (\* indicates previous reported expression in MG). D) Overlap of zebrafish MG enriched genes with previously reported MG transcriptomes from zebrafish, mouse and fly<sup>24,25,27,54,55</sup>. \* - indicates significance (Bonferroni adjusted p-value <0.001) by Fisher's exact test. E) Representative gene ontology proportions of MG genes enriched at 48, 60, 72, 96 and 120hpf.

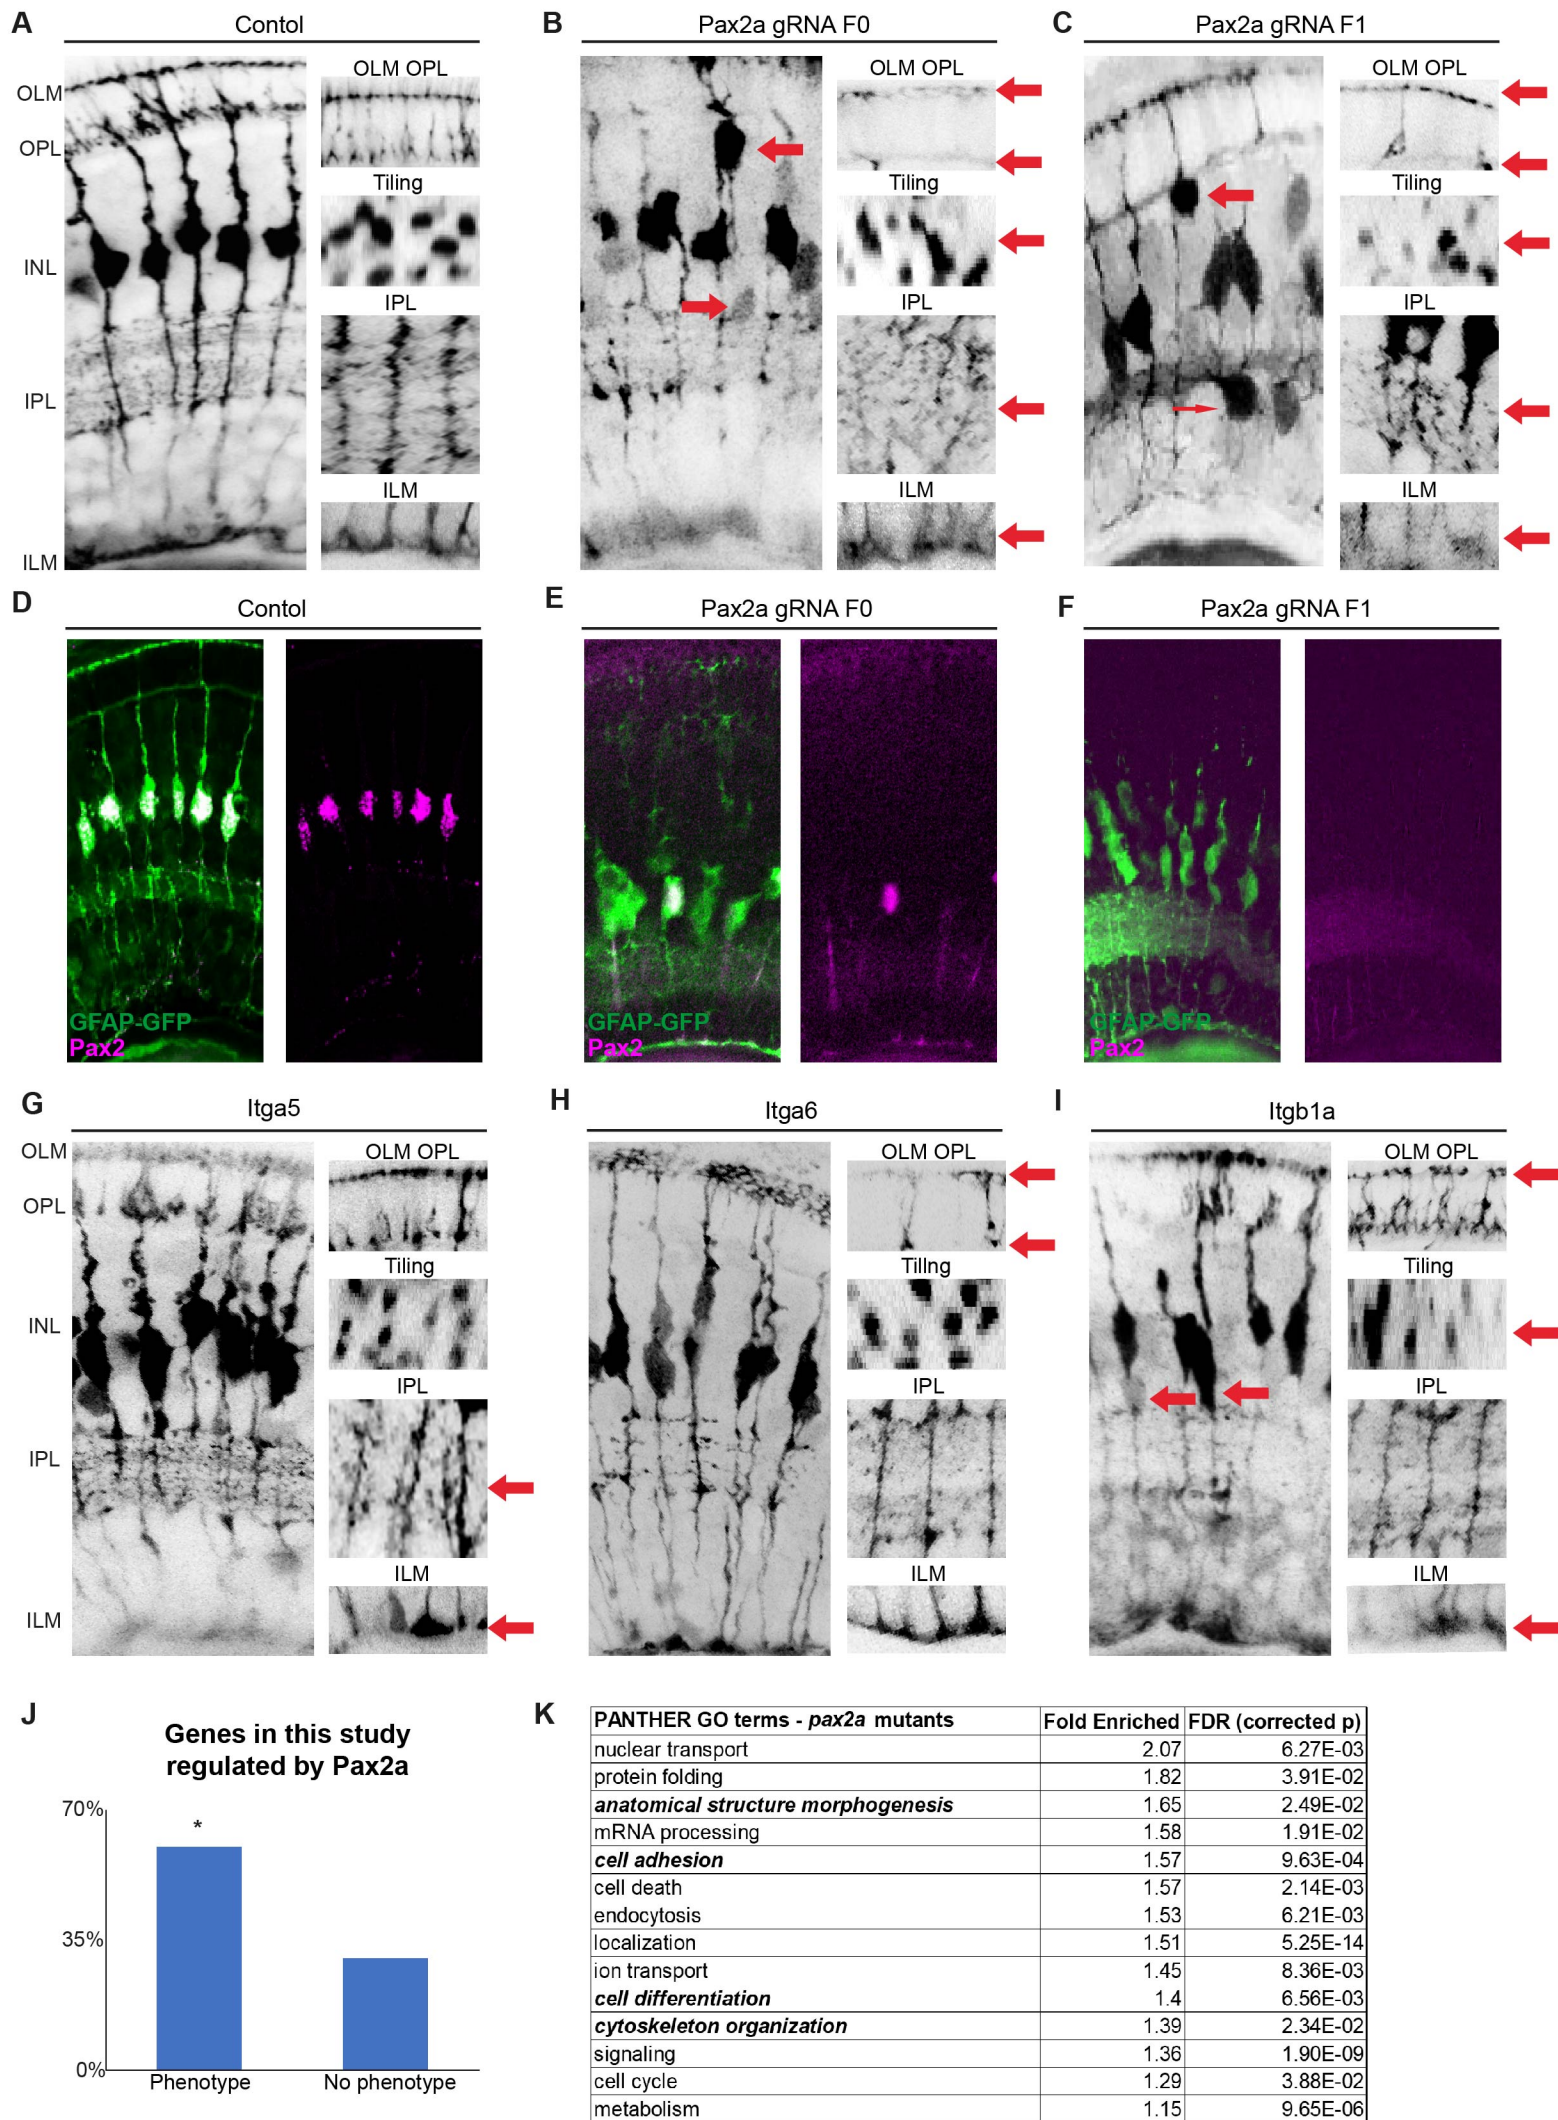

Figure 2

**Figure 2: A set of highly conserved genes that affect MG cell morphology.** A) *slc24a5* CRISPR injected control animals have normal MG cell morphology that extends from the apical to the basal surfaces, forming the ILM (inner limiting membrane) and OLM (outer limiting membrane) on either side. MG cells are also regularly tiled across in the eye with their cell bodies mostly restricted to the middle of the INL (inner nuclear layer) and are highly branched within the IPL (inner plexiform layer) and OPL (outer plexiform layer). B) F0 *pax2a* CRISPR injected animals have highly disorganised retinas with breaks in the OLM and ILM, abnormal tiling and apico-basal distribution of the cell bodies, as well as much less branching in the IPL and OPL. C) F1 *pax2a* CRISPR injected animals have similarly disorganised retinas, however, with more severe disruptions notable in the IPL and apico-basal distribution of cell bodies. D) In control animals (GFAP:GFP) Pax2 is expressed in all MG by 120hpf. E) F0 *pax2a* CRISPR injected animals lack Pax2 expression in most, but not all MG. F) F1 *pax2a* CRISPR injected animals Pax2 is absent from all MG. G) F0 *itga5* CRISPR injected animals have defects on the basal side of MG specifically in the ILM and IPL. H) F0 *Itag6* CRISPR injected animals have defects on the apical side of the cell in the OLM and OPL. I) F0 *itb1a* CRISPR injected animals have defects in cell body tiling and apico-basal position, as well as in OLM and ILM. J) Percentages of genes used in this study that either had or did not have a phenotype. \* - indicates significance by Fisher's exact test. K) GO terms for the top 500 genes significantly (adjusted  $p < 0.05$ ) up or down-regulated *pax2a* mutants.

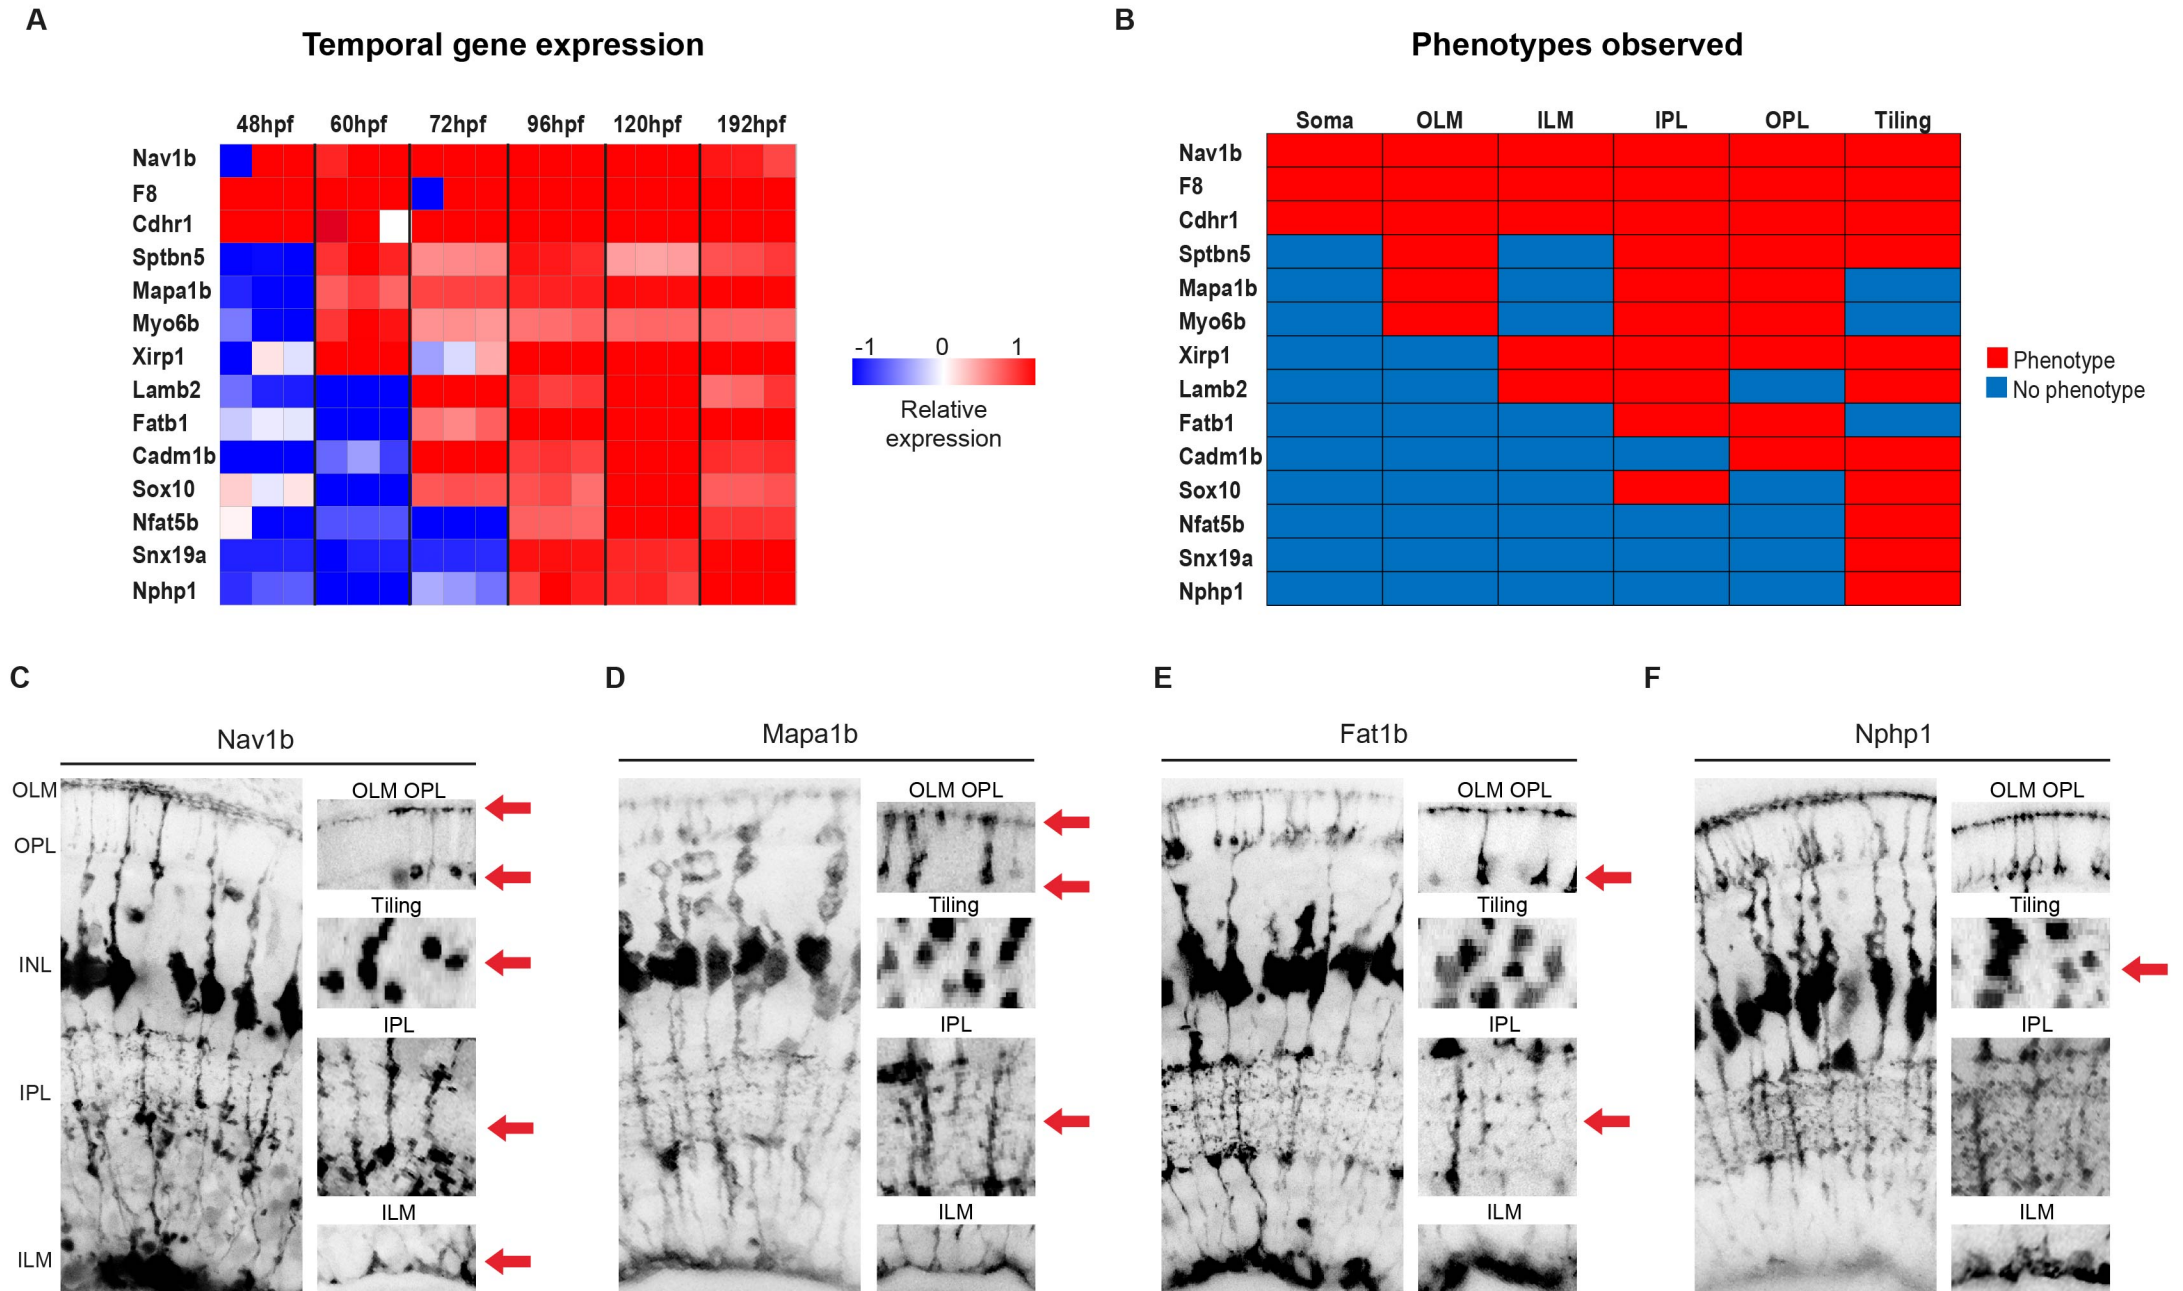

Figure 3

**Figure 3: Temporal gene expression dictates MG cell morphologies.** A) Heatmap to show the relative gene expression for genes tested. B) Summary of phenotypes observed for genes enriched across windows of MG cell differentiation. Red – phenotype, blue – no-phenotype. C) *nav1b* CRISPR injected animals have defects in apico-basal cell body position in the INL (inner nuclear layer), OLM (outer limiting membrane), OPL (outer plexiform layer), tiling, IPL (inner plexiform layer) and ILM (inner limiting membrane). D) *mapab1* CRISPR injected animals have defects in OLM, OPL and IPL. E) *fat1b* CRISPR injected animals have defects in OPL and IPL defects. F) *nphp1* CRISPR injected animals have defects in MG cell tiling.

**A**

**Temporal gene expression**

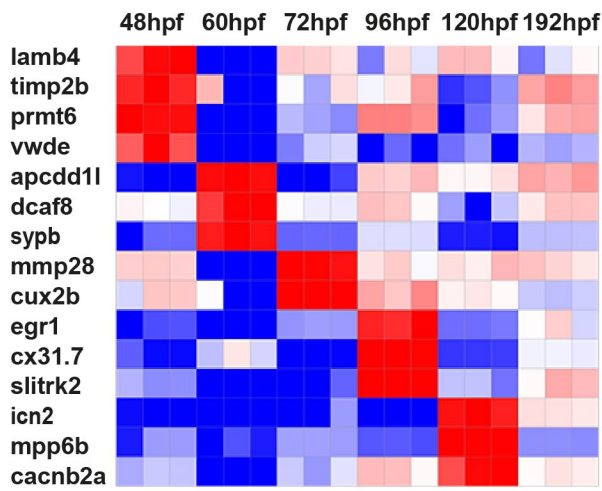

Relative expression -1 0 1

**Phenotypes observed**

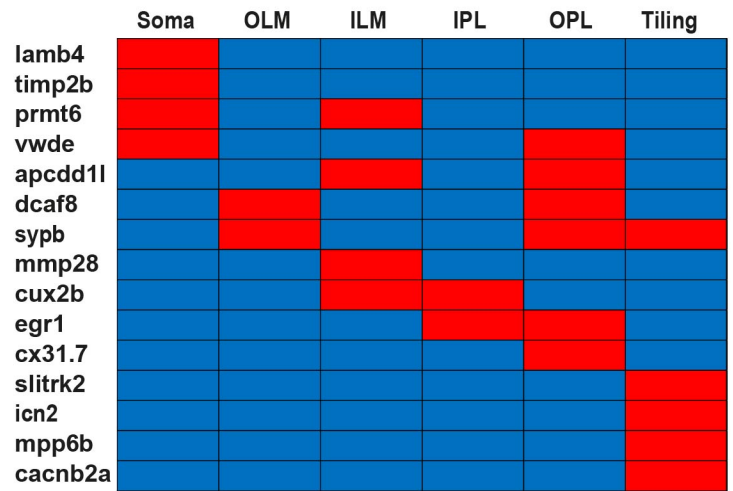

Phenotype No phenotype

**C**

**Lamb4**

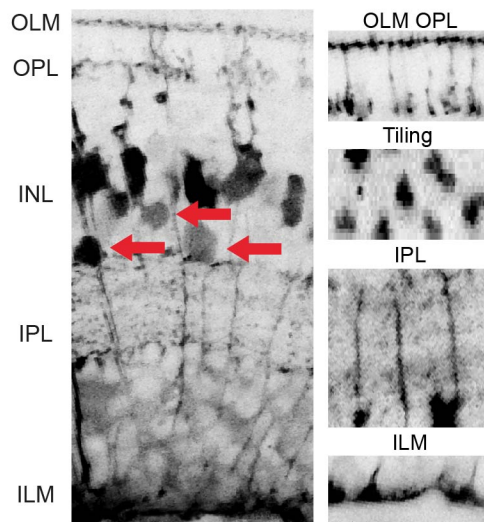

**D**

**Dcaf8**

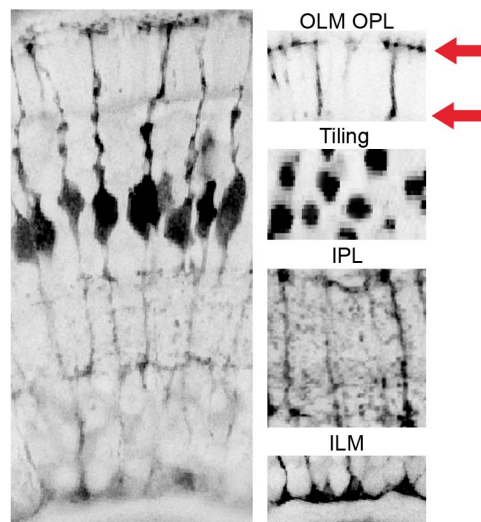

**E**

**Mmp28**

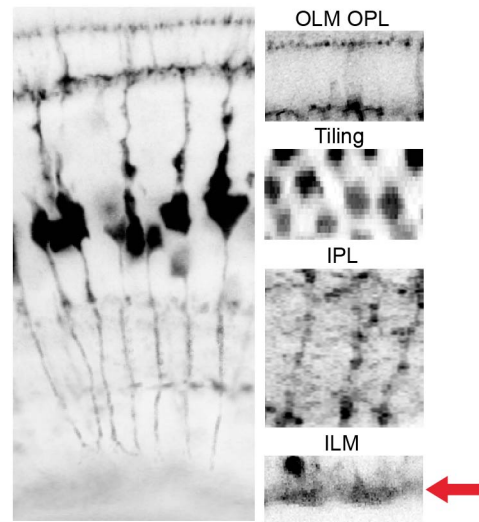

**F**

**Egr1**

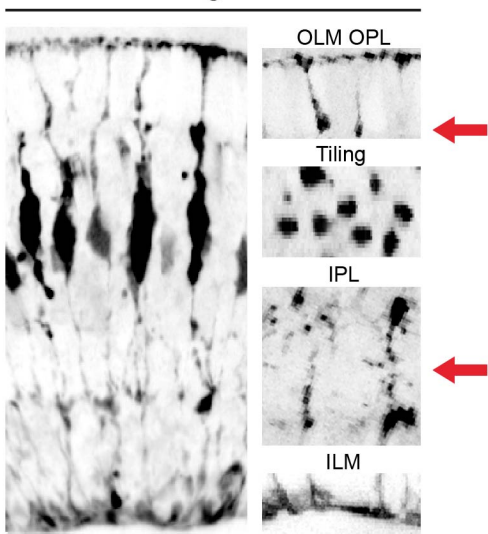

**G**

**Slitrk2**

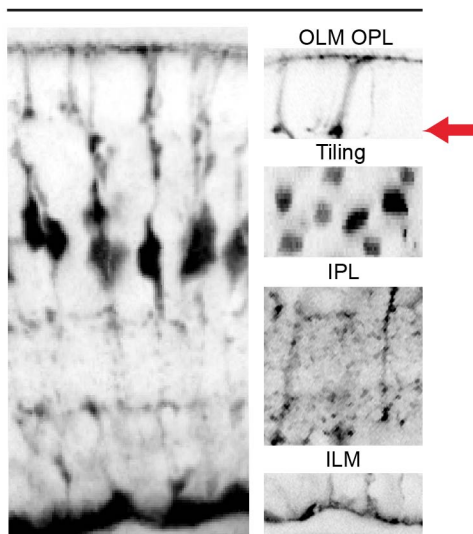

**H**

**icn2**

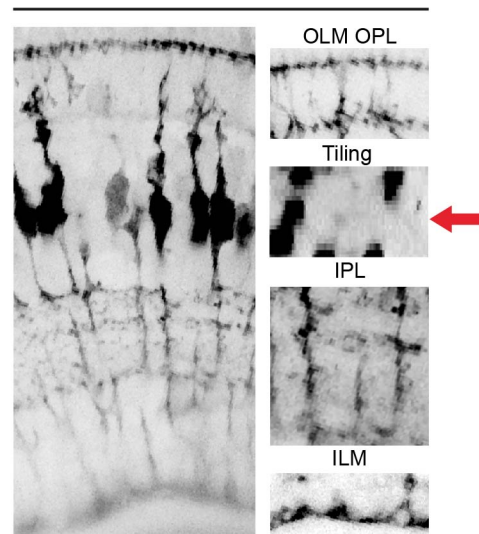

**Figure 4**

**Figure 4: Discrete gene expression regulates MG cell compartment morphology.** A)

Heatmap to show the relative gene expression for genes tested. These were all screen in F0 CRISPR injected mutants. B) Summary of phenotypes observed for genes enriched across windows of MG differentiation. Red – phenotype, blue – no-phenotype. C) *lamb4* mutants have defects in apico-basal distribution of MG cell bodies only. D) *dcaf8* mutants have defects in the OLM and OPL. E) *mmp28* CRISPR injected mutants have defects in the ILM only. F) *egr1* mutants have defects in the IPL and OPL. G) *slitkr2* mutants have defects in the OPL layer only.

A

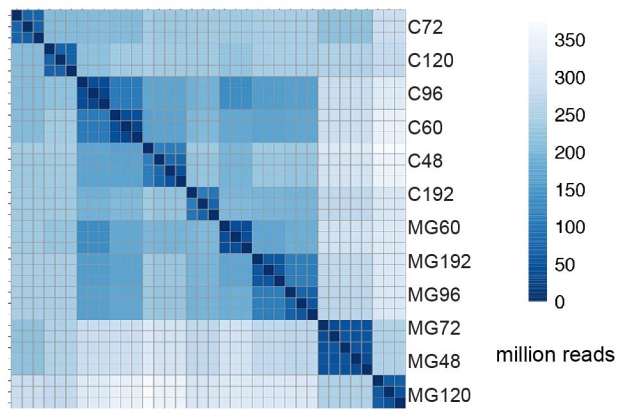

B

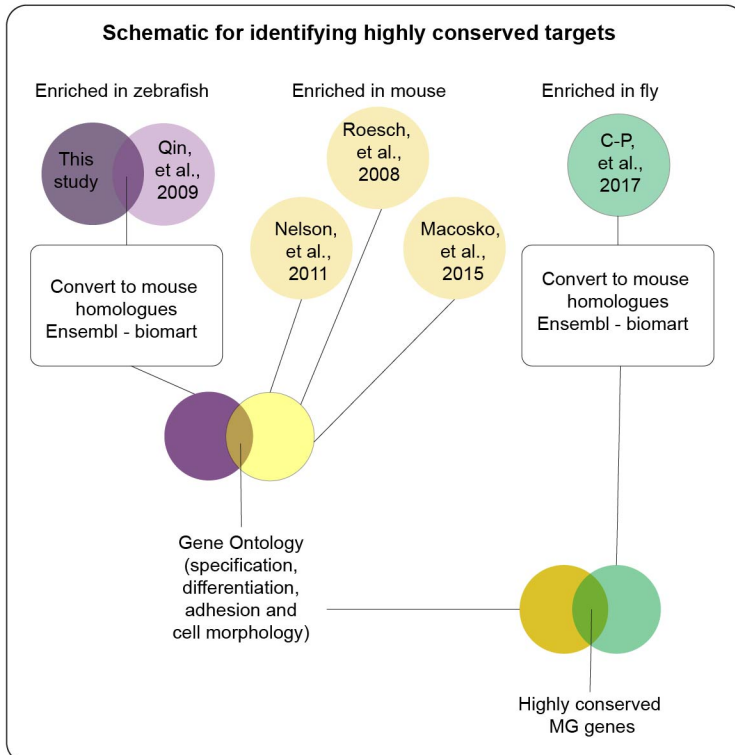

C

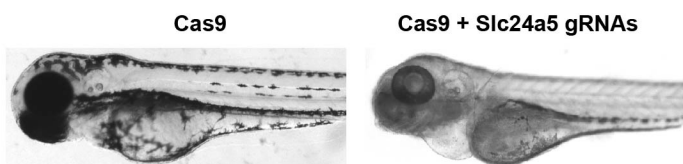

**Extended Data Figure 1: Temporal genetics of MG cell differentiation.** A) Hierarchical clustering of samples used for RNA-seq demonstrating consistency between the three replicates used for each time point (MG- GFAP-GFP sorted cells, C – GFP negative control tissue). B) Schematic representation of how highly conserved genes we bioinformatically identified. C) Cas9 only injected fish have normal pigmentation at 120hpf while those injected with Cas9 and the slc45a5 guide RNAs are mostly devoid of pigment.



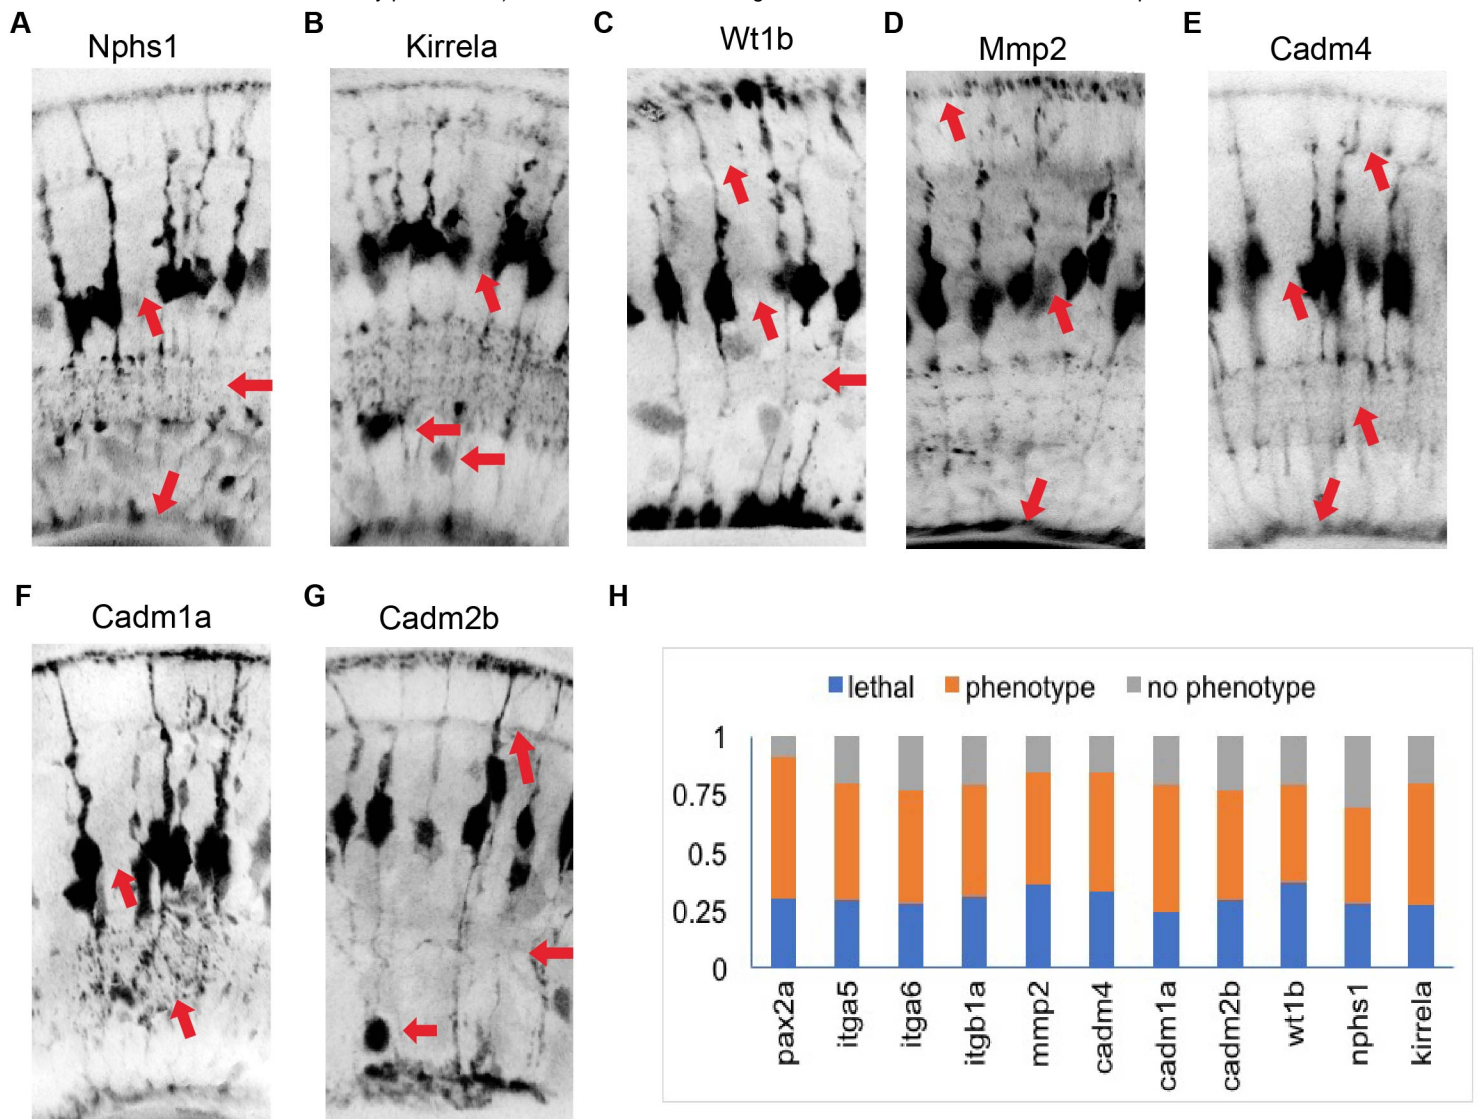

**Extended Data figure 2: Phenotypes of conserved highly conserved MG cell genes.** A) *mmp2* mutants have defects in OLM, ILM and tiling. B) *cadm4* mutants have defects in OPL, IPL, ILM and tiling. C) *Cadm1a* mutants have defects in IPL and tiling. D) *cadm2b* mutants have defects in a cell body positing, IPL OPL and tiling. E) *wt1* mutants have defects in cell body position, IPL, OPL and tiling. F) *nphs1* mutants have defects in ILM, IPL and tiling. G) *kirrela* mutants have defects in cell body position and tiling. H) Proportions of injected animals that died, had no phenotype or had a phenotype after injection by 120hpf.

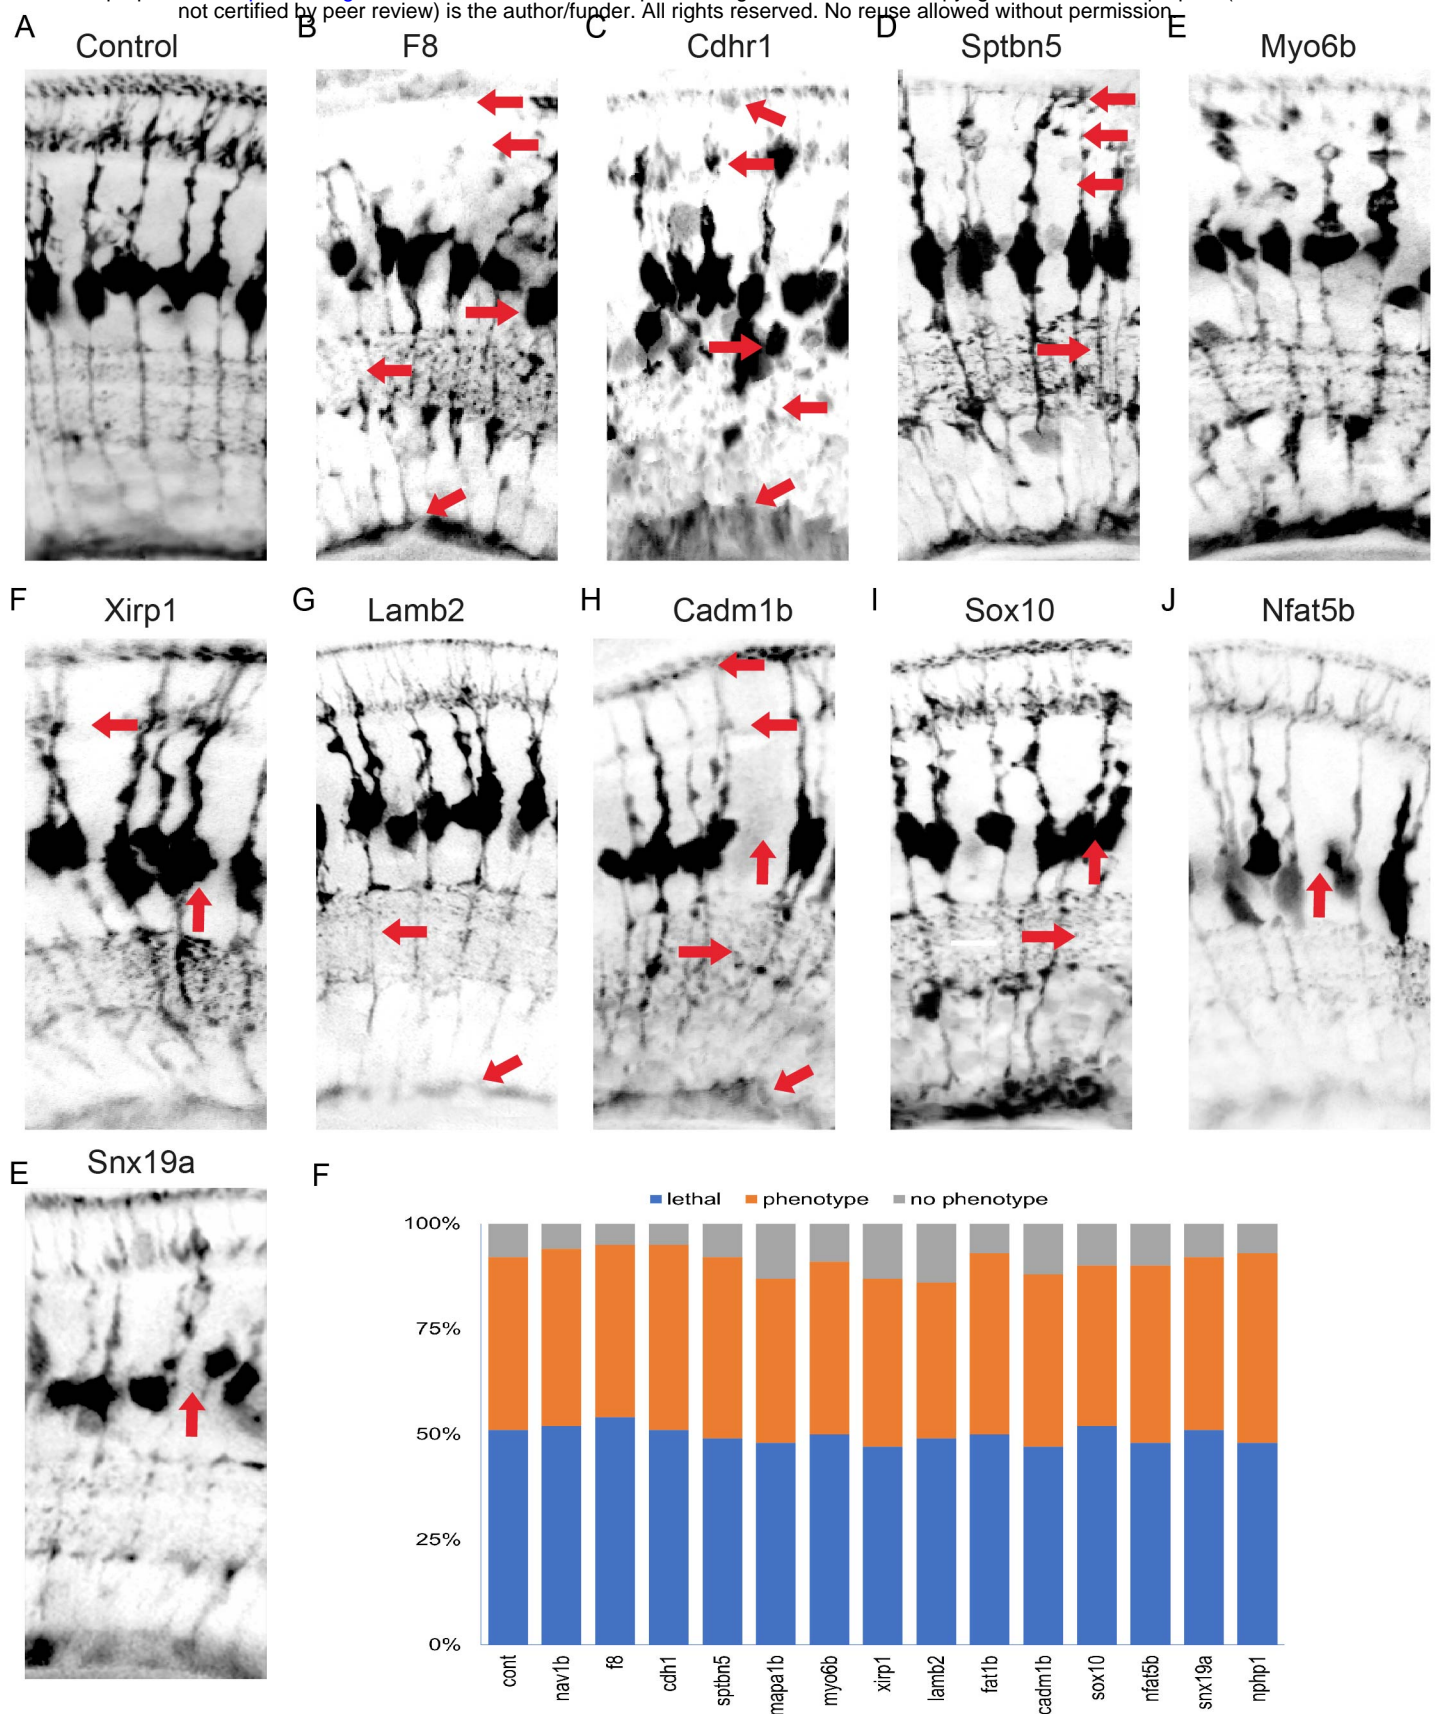

**Extended Data figure 3: Phenotypes of gene mutants enriched over windows of MG cell differentiation.** A) *slc45a5* controls have no observable MG phenotype. B) *f8* mutants have defects in cell body position, OLM, ILM, IPL, OPL and tiling. C) *cdhr1* mutants have defects in cell body position, OLM, ILM, IPL, OPL and tiling. D) *sptbn5* mutants have defects in OLM, IPL, OPL and tiling. E) *mapa1b* mutants have defects in OLM, IPL and OPL. F) *xirp1* mutants have defects in OPL and tiling. G) *lamb2* mutants have defects in ILM, IPL and tiling. H) *Cadm1b* mutants have defects in ILM, IPL, OPL and tiling. I) *sox10* mutants have defects in IPL and tiling. J) *nfat5b* mutants have tiling defects. K) *snx19a* mutants have tiling defects. L) Proportions of injected animals that died, had no phenotype or had a phenotype after injection by 120hpf.

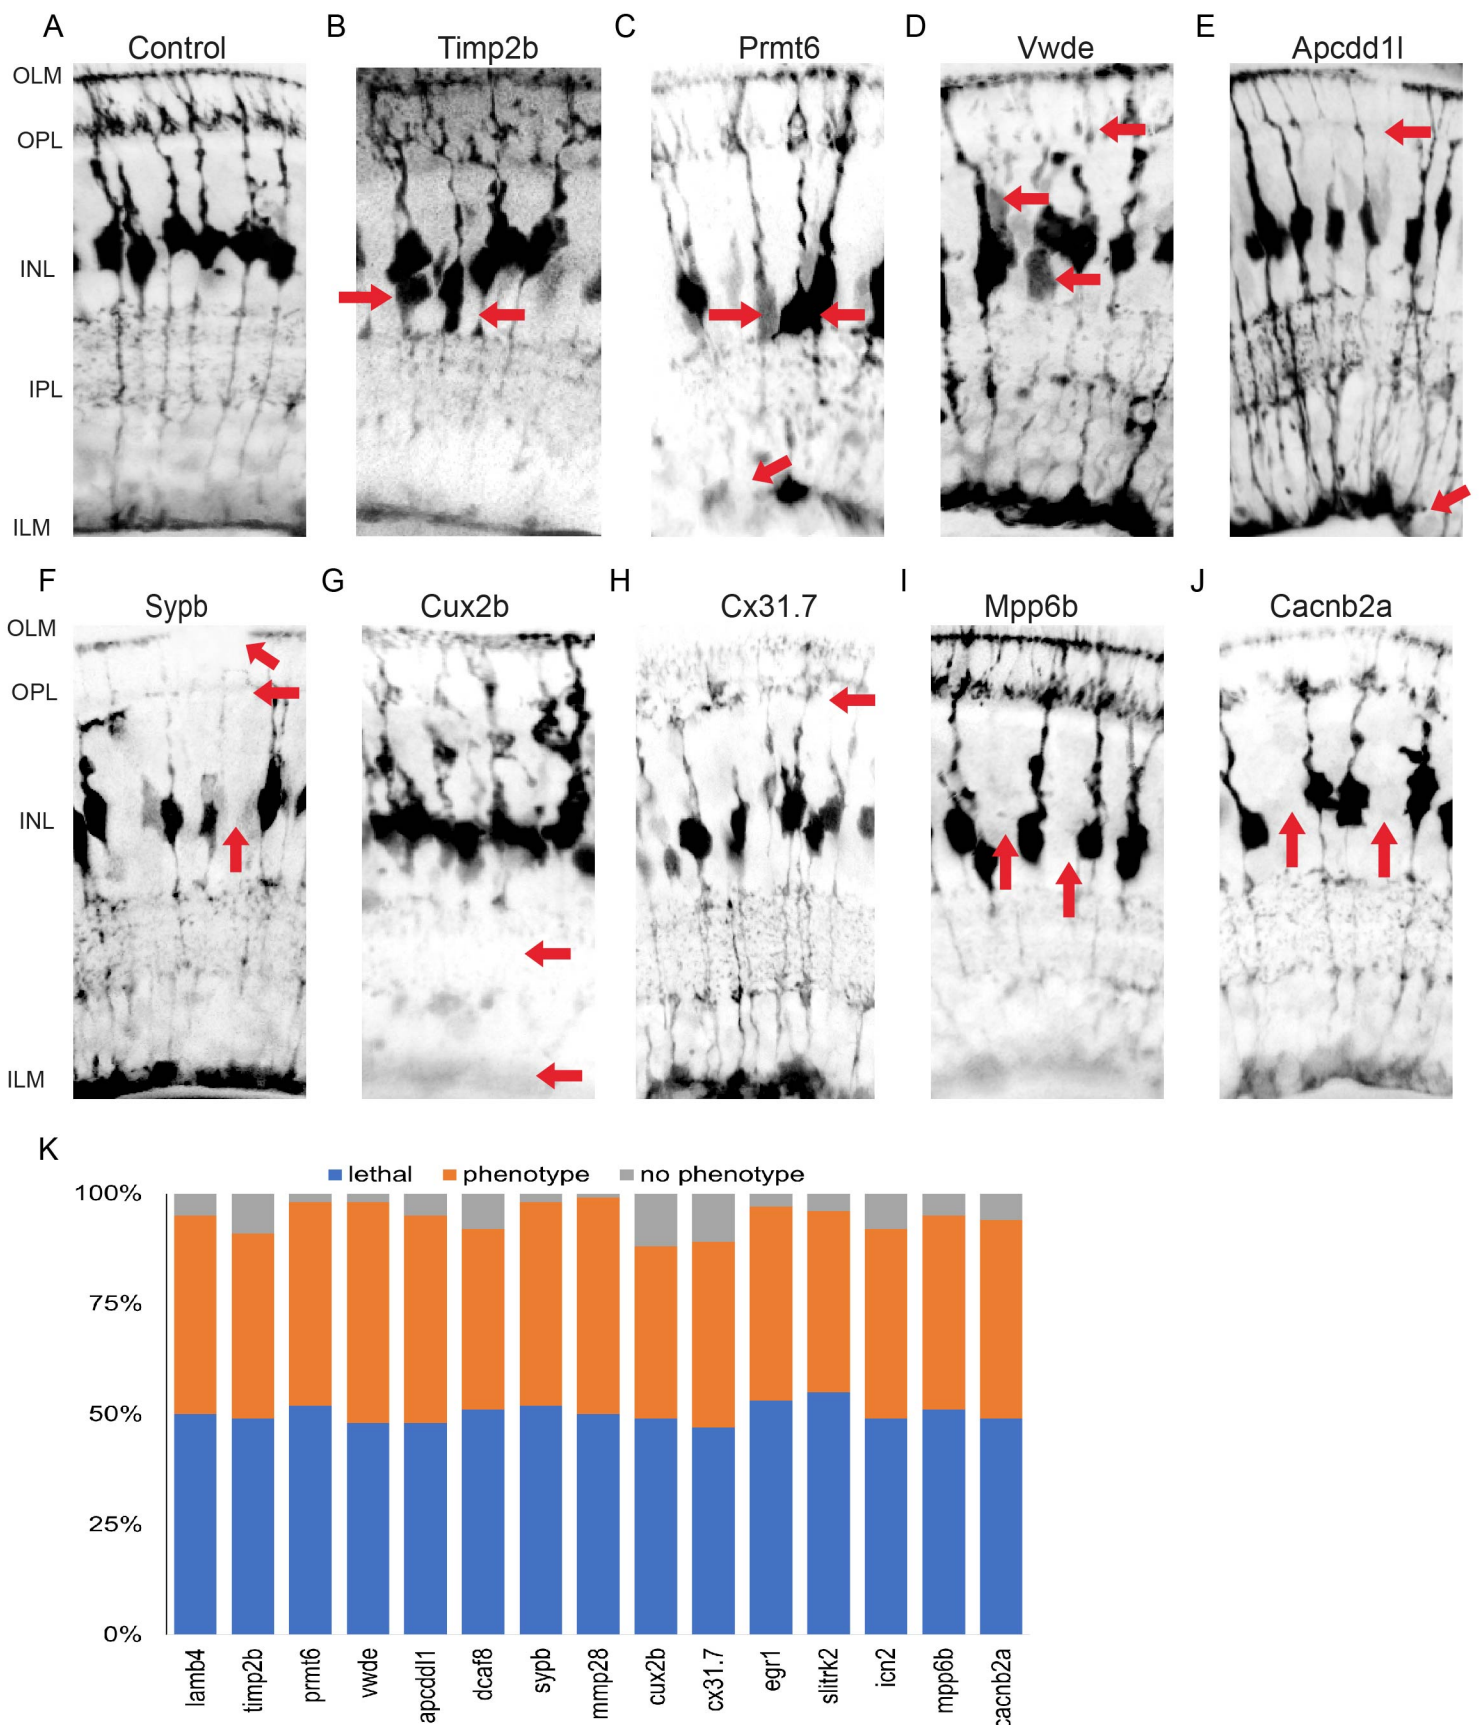

**Extended Data Figure 4: Phenotypes of gene mutants that are enriched at specific times of MG differentiation.** A) *slc45a5* controls have no observable MG phenotype. B) *timp2b* mutants have defects in cell body position. C) *prmt6* mutants have defects in cell body position and ILM. D) *vwde* mutants have defects in cell body position, OLM, ILM, IPL, OPL and tiling. E) *apcdd11* mutants have defects in IPL and OPL. F) *sybp* mutants have defects in OLM, OPL and tiling. G) *Cux2b* mutants have defects in ILM and IPL. H) *cx31.7* mutants have defects in tiling. I) *Mpp6b* mutants have defects in tiling. J) *cacnb2a* mutants have defects in tiling. K) Proportions of injected animals that died, had no phenotype or had a phenotype after injection by 120hpf.
